# Supplementary material for: Single‐cell RNA‐sequencing of Nicotiana attenuata corolla cells reveals the biosynthetic pathway of a floral scent
Source: PubMed Central journal article supplement — New Phytol. 2022 Feb 15;234(2):527–44. doi: 10.1111/nph.17992 (PMC9305527; doi:10.1111/nph.17992), 2022-02-15
Supplement: NPH-234-527-s001.pdf [file NPH-234-527-s001.pdf]

***New Phytologist* Supporting Information**

Article title: **Single-cell RNA-sequencing of *Nicotiana attenuata* corolla cells reveals the biosynthetic pathway of a floral scent**

Authors: Moonyoung Kang<sup>1</sup>, Yuri Choi<sup>1</sup>, Hyeonjin Kim<sup>1</sup>, and Sang-Gyu Kim<sup>1\*</sup>

<sup>1</sup> Department of Biological Sciences, Korea Advanced Institute for Science and Technology, Daejeon 34141, Republic of Korea

\*Corresponding author: Sang-Gyu Kim (sgkim1@kaist.ac.kr, +82-42-350-2645)

Article acceptance date: 05 January 2022

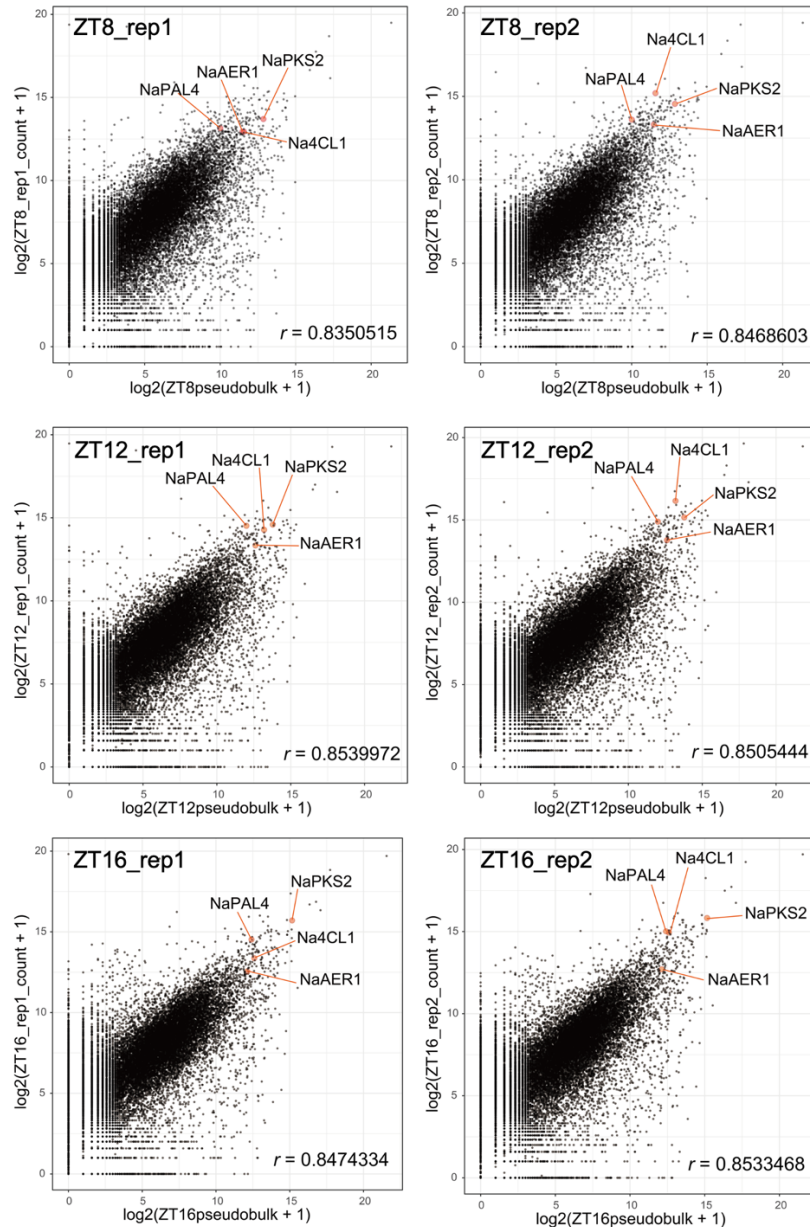

**Figure S1. Correlation analysis between bulk-RNA sequencing and scRNA-seq datasets**

Scatter plots representing the correlation between bulk RNA sequencing and scRNA-seq datasets in each time point. Pseudo-bulk datasets of scRNA-seq were generated by pooling unique molecular identifier (UMI) across cells, and bulk RNA-seq count numbers were log<sub>2</sub>-transformed. Pearson's correlation coefficients between two sequencing techniques were calculated and annotated inside figures. The global transcriptome profiles from the two datasets were highly correlated with coefficients over 0.8.

| Timepoints | Estimated Number of Cells | Mean Reads per Cell | Median Genes per Cell | Number of Reads | Valid Barcodes | Sequencing Saturation | Q30 Bases in Barcode | Q30 Bases in RNA Read | Q30 Bases in Sample Index | Q30 Bases in UMI | Reads Mapped to Genome | Reads Mapped Confidently to Genome | Reads Mapped Confidently to Intergenic Regions | Reads Mapped Confidently to Intronic Regions | Reads Mapped Confidently to Exonic Regions | Reads Mapped Confidently to Transcriptome | Reads Mapped Antisense to Gene | Fraction Reads in Cells | Total Genes Detected in scRNA Sequencing | Median UMI Counts per Cell | Total Genes Detected in Bulk RNA Sequencing | Gene Discovery % Compared to Bulk RNA Sequencing |
|------------|---------------------------|---------------------|-----------------------|-----------------|----------------|-----------------------|----------------------|-----------------------|---------------------------|------------------|------------------------|------------------------------------|------------------------------------------------|----------------------------------------------|--------------------------------------------|-------------------------------------------|--------------------------------|-------------------------|------------------------------------------|----------------------------|---------------------------------------------|--------------------------------------------------|
| ZT 8       | 1,024                     | 405,136             | 1,233                 | 414,859,988     | 95.50%         | 83.60%                | 97.20%               | 93.40%                | 95.40%                    | 97.40%           | 25.70%                 | 22.40%                             | 6.60%                                          | 0.30%                                        | 15.50%                                     | 15.00%                                    | 0.10%                          | 80.40%                  | 19,553                                   | 4,263                      | 22,846                                      | 85.59%                                           |
| ZT 12      | 1,038                     | 415,875             | 1,307                 | 431,678,469     | 95.40%         | 84.50%                | 97.50%               | 93.90%                | 96.40%                    | 97.60%           | 33.00%                 | 29.20%                             | 6.10%                                          | 0.60%                                        | 22.50%                                     | 21.90%                                    | 0.20%                          | 84.00%                  | 19,842                                   | 5,428                      | 22,826                                      | 87.70%                                           |
| ZT 16      | 1,718                     | 247,401             | 1,073                 | 425,035,816     | 96.20%         | 90.00%                | 97.70%               | 94.00%                | 96.90%                    | 97.70%           | 45.50%                 | 40.10%                             | 7.10%                                          | 0.70%                                        | 32.30%                                     | 31.40%                                    | 0.20%                          | 79.80%                  | 18,917                                   | 3,246                      | 22,803                                      | 82.96%                                           |

### Figure S2. QC metrics of scRNA-seq datasets

Mean reads per cell are over 200,000 for each dataset, and median genes per cell exceed one thousand. In the single cell population, we detected 82 ~ 87 % of genes detected in bulk RNA sequencing. Mapping ratio is relatively low due to complexity and incomplete gene annotation of *N. attenuata* draft genome (assembly NIATTr2).

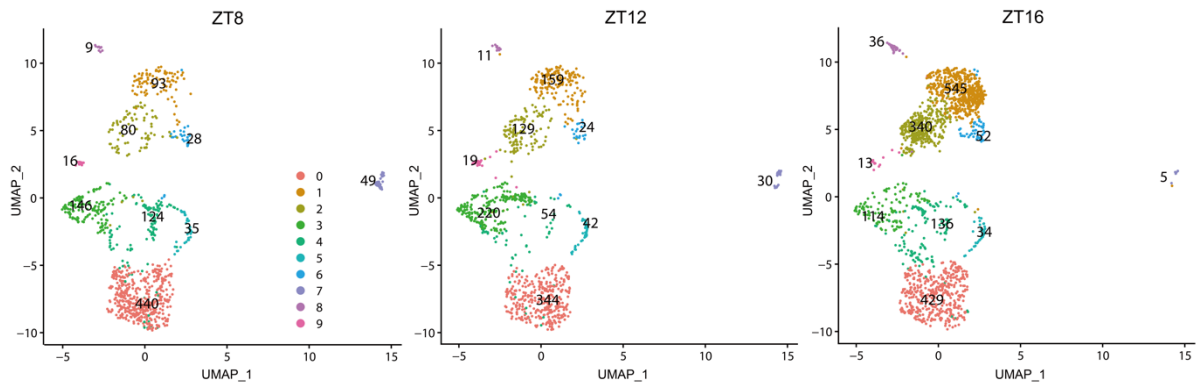

**Figure S3. Cells are displayed by an integrated uniform manifold approximation and projection (UMAP) plot in two dimensions**

UMAP plots showing dimensional reduction of the distribution of 1020, 1032, and 1704 cells collected at ZT 8, ZT 12, and ZT 16, respectively. UMAP projection yielded overlapping distributions of cells from each scRNA-seq time point. The exact numbers of cells are represented inside each cluster.

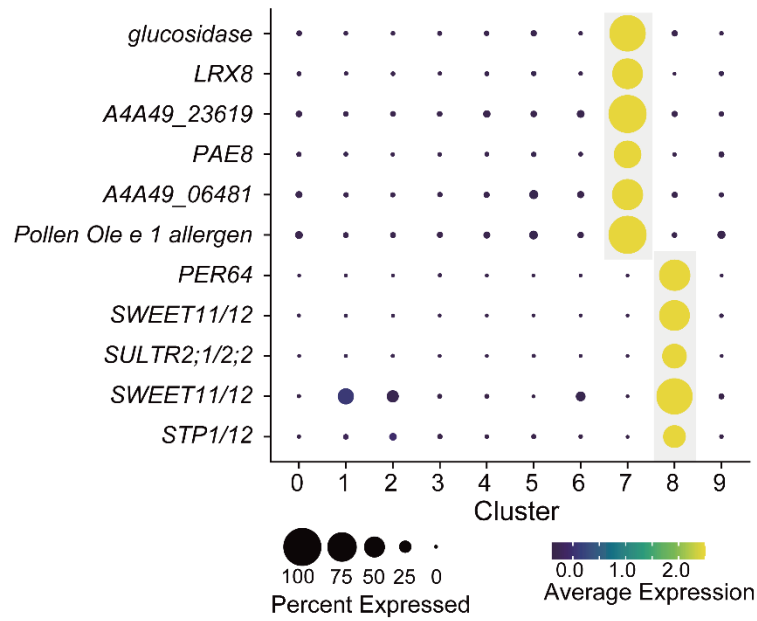

**Figure S4. Pollen and vasculature-specific marker genes are exclusively expressed in clusters 7 and 8, respectively**

Pollen marker genes and phloem/xylem marker genes are exclusively detected in clusters 7 and 8, respectively. *SULTR2;1/2;2*, a sulfate transporter, and *SWEET11/12* and a *sugar transporter1/12* (*STP1/12*) are known to be exclusively expressed in *A. thaliana* vasculatures (Chen *et al.*, 2012; Maruyama-Nakashita *et al.*, 2015; Kim *et al.*, 2021). All marker genes in cluster 7 are specifically expressed in pollen or pollen tubes as shown in figure S5 (Brockmüller *et al.*, 2017). Dot size and color indicate the percentage of cells expressing a marker gene and mean expression value across cells in each cluster, respectively.

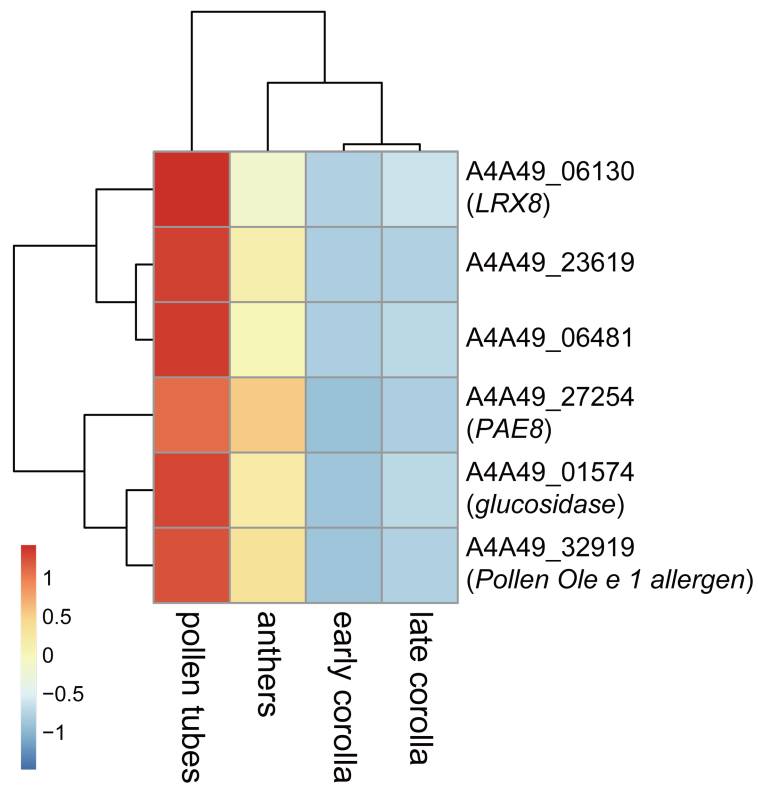

**Figure S5. Validation of pollen-specific marker genes**

Pollen specific marker genes are exclusively expressed in anthers and pollens in public bulk RNA-seq datasets (Li *et al.*, 2016). TPM values were log<sub>2</sub>-transformed and scaled for heatmap.

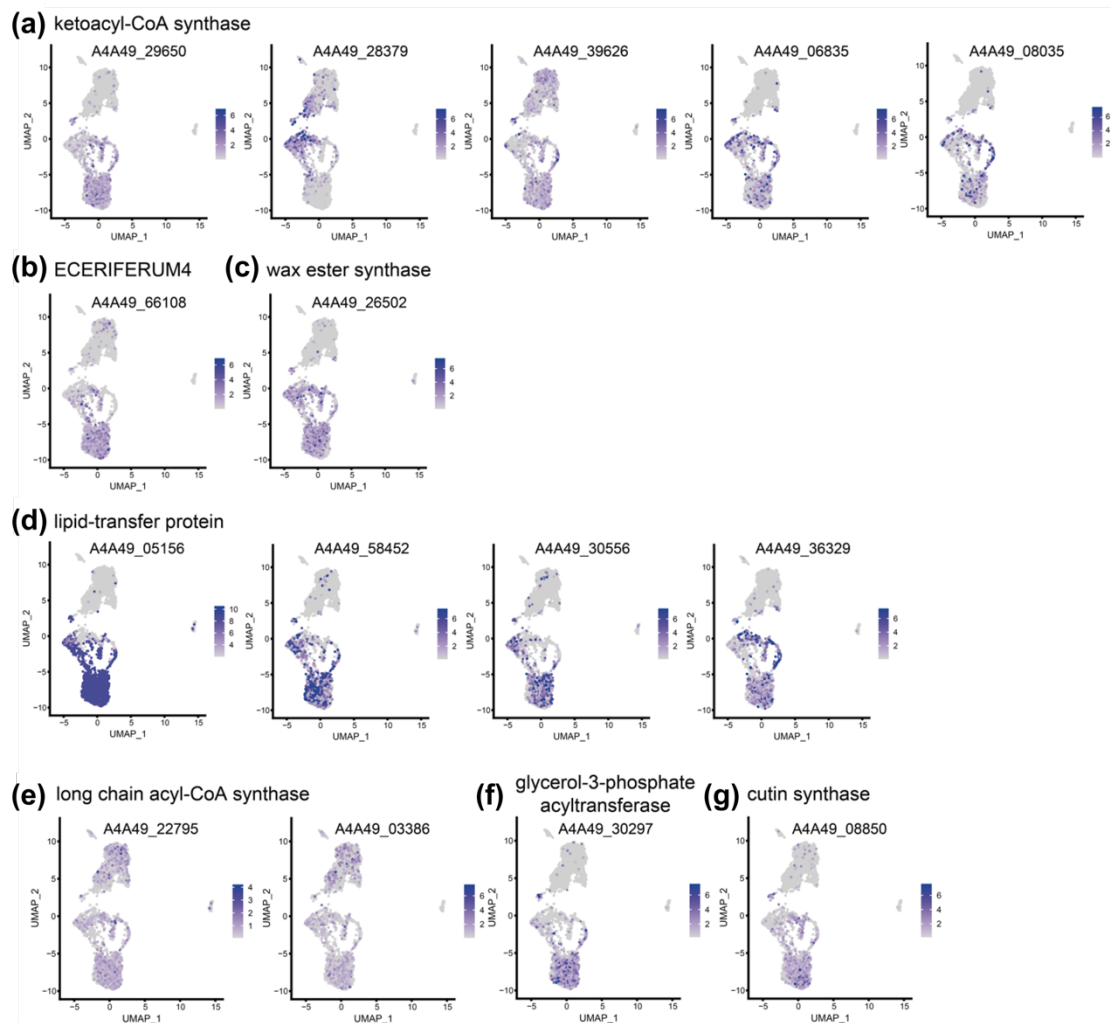

**Figure S6. Putative wax and cutin biosynthesis genes are more expressed in clusters 0, 3, 4, 5, and 9**

(a) Ketoacyl-CoA synthase (A4A49\_29650, 28379, 39626, 06835, 08035), (b) ECERIFERUM4 (A4A49\_66108), (c) wax ester synthase/diacylglycerol acyltransferase 1 (A4A49\_26502), and (d) lipid-transfer proteins (A4A49\_05156, 58452, 30556, 36329), which are likely to participate in wax transport. (e) Long chain acyl-CoA synthetase 4 (A4A49\_22795, 03386), (f) Glycerol-3-phosphate acyltransferase 6 (A4A49\_30297), (g) Cutin synthase-like (A4A49\_08850), which are likely to participate in cutin biosynthesis. These results suggest that the clusters 0, 3, 4, 5, and 9 are epidermal cells. Each dot indicates single cells, and transcript levels of genes are displayed in color scale.

| identity    | short name                              | locus tag   | <i>A. thaliana</i>                           | % Similarity (Blosum62) | E-values of blastp |
|-------------|-----------------------------------------|-------------|----------------------------------------------|-------------------------|--------------------|
| vasculature | <i>PER64</i>                            | A4A49_03359 | AT4G33420 (Per47), AT5G42180 (Per64)         | 84.29%, 74.32%          | 6e-163, 1e-92      |
|             | <i>SWEET11/12</i>                       | A4A49_06893 | AT3G48740 (SWEET11), AT5G23660 (SWEET12)     | 75.768%, 74.49%         | 4e-92, 3e-91       |
|             | <i>SULTR2;1/2;2</i>                     | A4A49_32258 | AT5G10180 (SULTR2;1), AT1G77990 (SULTR2;2)   | 89.788%, 88.123%        | 0.0, 0.0           |
|             | <i>SWEET11/12</i>                       | A4A49_14806 | AT3G48740 (SWEET11), AT5G23660 (SWEET12)     | 73.597%, 74.503%        | 2e-98, 3e-97       |
|             | <i>STP1/12</i>                          | A4A49_31174 | AT1G11260 (STP1), AT4G21480 (STP12)          | 90.244%, 91.865%        | 0.0, 0.0           |
| Epidermis   | <i>NaKCS10</i>                          | A4A49_29650 | AT2G26250 (KCS10)                            | 89.331%                 | 0.0                |
|             | <i>NaKCS11-like</i>                     | A4A49_28379 | AT1G04220 (DAISY/KCS2)                       | 90.038%                 | 0.0                |
|             | <i>NaKCS19-like</i>                     | A4A49_39626 | AT5G43760 (KCS20)                            | 81.992%                 | 0.0                |
|             | <i>NaKCS6</i>                           | A4A49_06835 | AT1G68530 (KCS6)                             | 96.378%                 | 0.0                |
|             | <i>NaKCS11-like</i>                     | A4A49_08035 | AT5G43760 (KCS20)                            | 90.737%                 | 0.0                |
|             | <i>NaFAR3-like</i>                      | A4A49_66108 | AT4G33790 (CER4/FAR3)                        | 78.442%                 | 5e-125             |
|             | <i>NaWSD1-like</i>                      | A4A49_26502 | AT5G53390 (WSD11)                            | 75.143%                 | 2e-160             |
|             | <i>NaNLTP2_2</i>                        | A4A49_05156 | AT2G38530 (LTP2)                             | 72.034%                 | 1e-23              |
|             | <i>NaNLTP2_4</i>                        | A4A49_58452 | AT2G38530 (LTP2)                             | 74.576%                 | 2e-20              |
|             | <i>NaNLTP2_5</i>                        | A4A49_30556 | AT2G38530 (LTP2)                             | 73.729%                 | 5e-20              |
|             | <i>NaLTP1-like</i>                      | A4A49_36329 | AT5G59310 (LTP4)                             | 82.051%                 | 2e-33              |
|             | <i>NaLACS4-like</i>                     | A4A49_22795 | AT1G64400 (LACS3)                            | 90.881%                 | 0.0                |
|             | <i>NaGPAT6</i>                          | A4A49_30297 | AT2G38110 (GPAT6)                            | 92.843%                 | 0.0                |
|             | <i>AT2G04570-like</i>                   | A4A49_08850 | AT2G04570 (OSP1)                             | 83.427%                 | 3e-158             |
| parenchyma  | <i>photosystem subunit H-1</i>          | A4A49_26930 | AT3G16140 (photosystem I subunit H-1)        | 93.103%                 | 4e-55              |
|             | <i>photosystem I LHC gene 3</i>         | A4A49_09113 | AT1G61520 (photosystem I LHC gene 3)         | 97.81%                  | 4e-150             |
|             | <i>photosystem II subunit S</i>         | A4A49_26955 | AT1G44575 (photosystem II subunit S)         | 86.861%                 | 5e-82              |
|             | <i>photosystem I subunit K</i>          | A4A49_02826 | AT1G30380 (photosystem I subunit K)          | 96.923%                 | 6e-66              |
|             | <i>photosystem II reaction center W</i> | A4A49_05181 | AT2G30570 (photosystem II reaction center W) | 85.185%                 | 9e-41              |
|             | <i>pigment defective 334-ATPase</i>     | A4A49_01739 | AT4G32260 (pigment defective 334)            | 85.845%                 | 7e-66              |

**Figure S7. Protein sequences of marker genes are similar to their *A. thaliana* orthologs**

Orthologs in *Arabidopsis thaliana* were searched by BLASTp at The Arabidopsis Information Resource site (<https://www.arabidopsis.org/Blast/>), based on Araport11 protein sequences datasets. Marker genes are similar to their orthologs over 72 % similarity. Expect values (E-values) from BLASTP results were near 0.0, suggesting conserved functions. For example, *AtGPAT6*, a gene involved in nanoridge formation on the surface of flowers, is homologous to *NaGPAT6*. (Li-Beisson *et al.*, 2009). A4A49\_08850 is homologous to OSP1, a GDSL lipase playing roles in wax biosynthesis (Tang *et al.*, 2020). PER, peroxidase; SWEET, sugars will eventually be exported transporters; KCS, ketoacyl-CoA synthase; FAR3, fatty acid reductase 3 (same as ECERIFERUM 4); NLTP, nonspecific lipid transfer protein; LTP, lipid transfer protein; LACS, long chain acyl-CoA synthetase 3; WSD1, wax ester synthase/diacylglycerol acyltransferase 1; GPAT6, glycerol-3-phosphate sn-2-acyltransferase 6; OSP1, occluded stomatal pores 1.



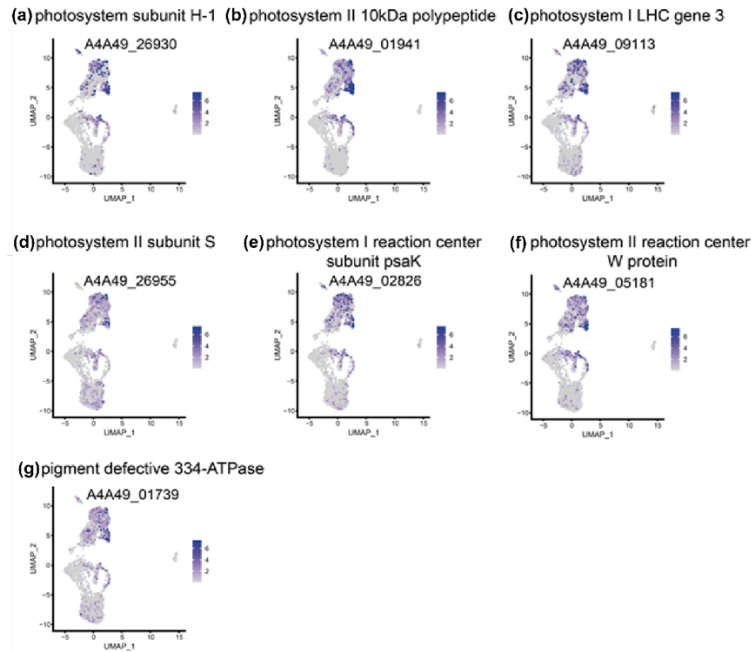

**Figure S8. Subunits of photosystem I and II complex are enriched in clusters 1, 2, and 6** (a) Photosystem subunit H-1 (A4A49\_26930), (b) Photosystem II 10kDa polypeptide (A4A49\_01941), (c) Photosystem I LHC gene 3 (A4A49\_09113) (d) Photosystem II subunit S (A4A49\_26955), (e) Photosystem I reaction center subunit psaK (A4A49\_02826), (f) Photosystem II reaction center W protein (A4A49\_05181), (g) Pigment defective 334-ATPase (A4A49\_01739): all are likely to be subunits of photosystem complex. Each dot indicates single cells, and the expression levels of genes are displayed on color scale. Cluster 6 is defined as a chlorenchyma cell in the throat of corolla, which retained chloroplasts, and clusters 1 and 2 are defined as parenchymal cells.

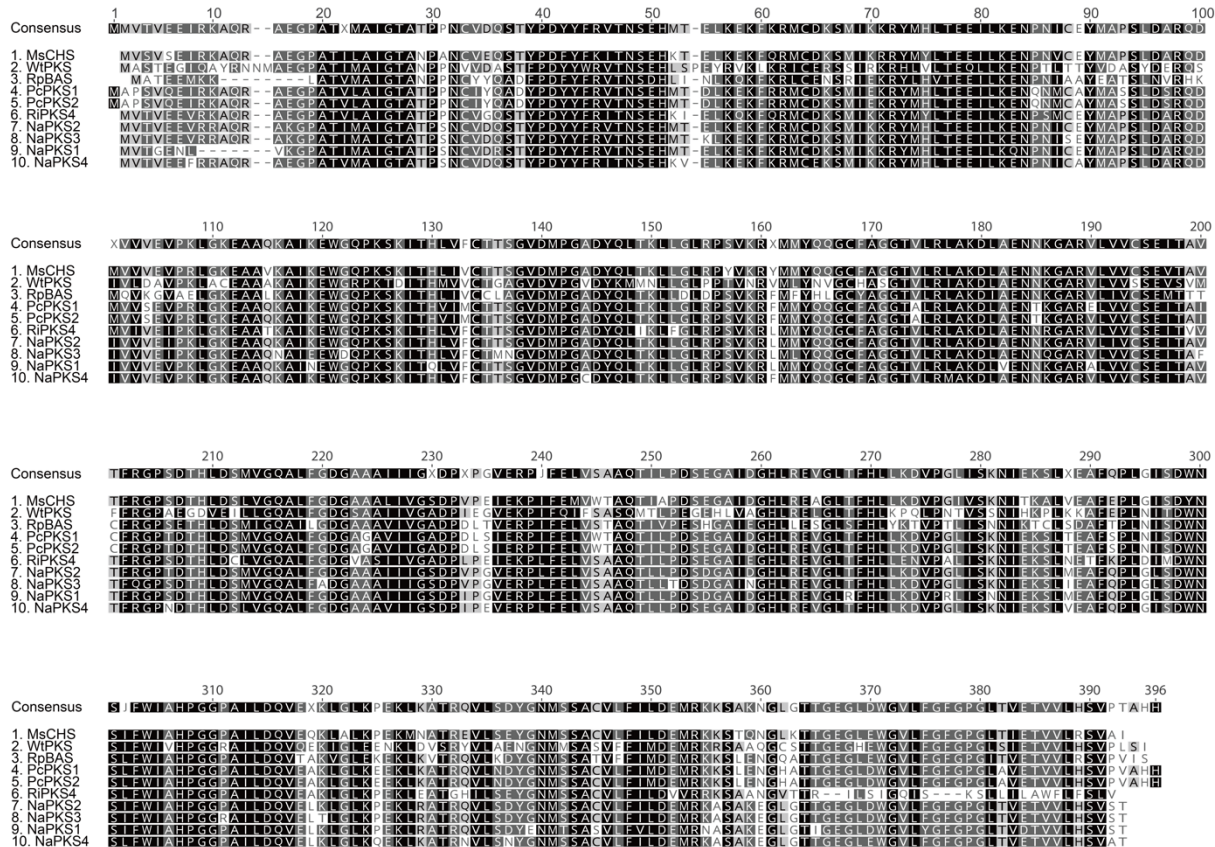

**Figure S9. NaPKS1/2/3/4 share high sequence similarity with polyketide synthase proteins of other species**

Protein sequence alignments of polyketide synthase (PKS)-related of proteins in several plant species. Full-length amino acid sequences were aligned using Clustal W implemented in the Geneious software. MsCHS, *Medicago sativa* CHS, L02902; WtPKS, *Wachendorfia thyrsiflora* polyketide synthase, AY727928; RpBAS, *Rheum palmatum* benzalacetone synthase, AAK82824; PcPKS1, *Polygonum cupidatum* PKS1, ABK92281; PcPKS2, *Polygonum cupidatum* PKS12; NaPKS1, *Nicotiana attenuata* PKS1 (renamed from chalcone synthase 1), A4A49\_08280; NaPKS2, *N. attenuata* PKS2 (renamed from chalcone synthase 2), A4A49\_34074; NaPKS3, *N. attenuata* PKS3 (renamed from chalcones synthase 3), A4A49\_39367; NaPKS4, *N. attenuata* PKS4 (renamed from chalcone synthase 4), A4A49\_65921.

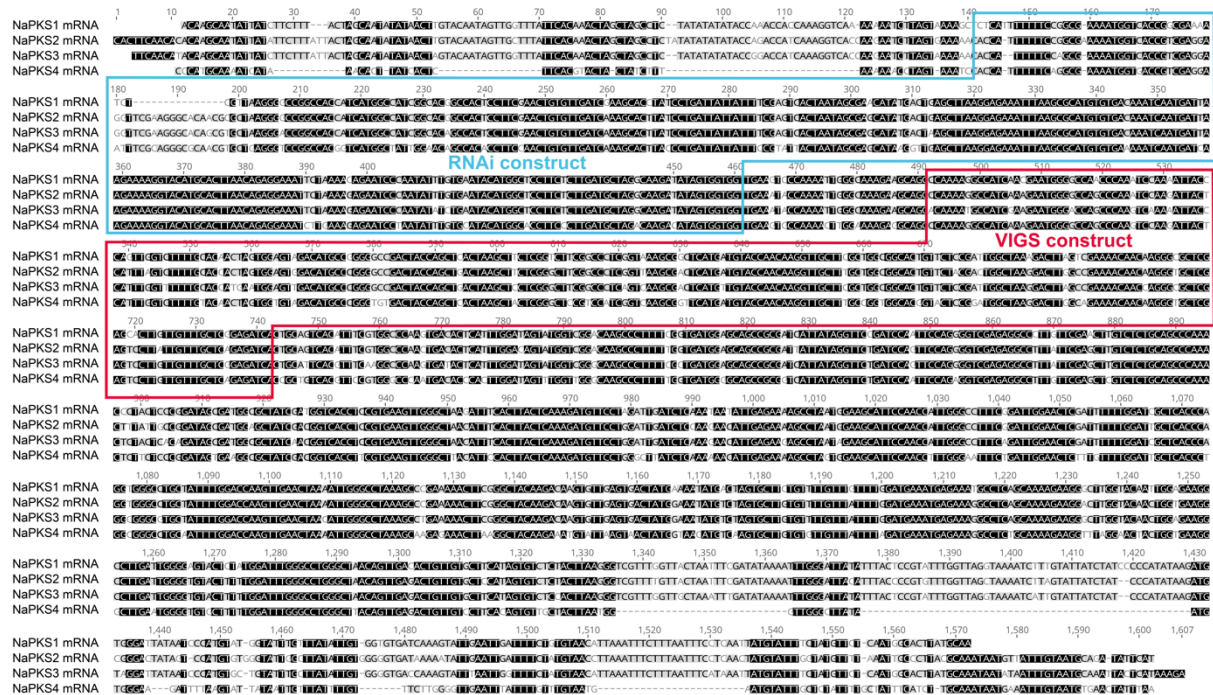

**Figure S10. Target sequences for NaPKS RNAi experiments (used in previous studies, NaCHAL) and VIGS experiments (used in this study)**

Because *NaPKS1/2/3/4* are highly similar to each other, it is hard to design the specific construct of RNA interference (RNAi) and VIGS for one gene. Only 10 nucleotides are different between *NaPKS3* (A4A49\_39367) and *NaPKS2* (A4A49\_34074) in the RNAi construct target sequence (total 317 base pairs) used previously in Kessler *et al.* (2008). The difference between *NaPKS3* and *NaPKS1* (A4A49\_08280) is 34 nucleotides, and the difference between *NaPKS3* and *NaPKS4* (A4A49\_65921) is 39 nucleotides in the RNAi construct. Our VIGS sequence (250 bp) also contained small differences between those four genes; *NaPKS3* sequences in the target region differ from *NaPKS1*, *NaPKS2*, and *NaPKS4* by 29, 26, and 39 nucleotides, respectively.

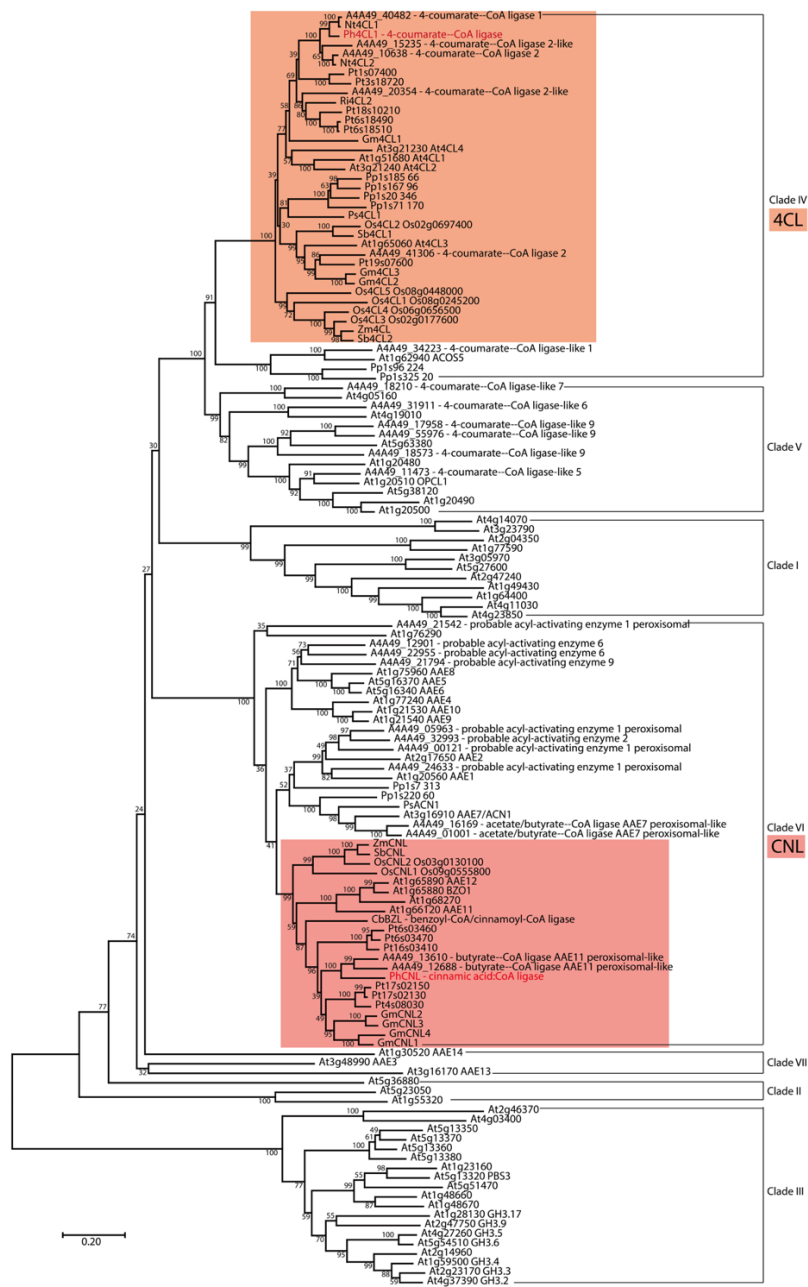

**Figure S11. Cladogram of *N. attenuata* 4CL, CNL homologs within acyl-activating enzyme (AAE) superfamily**

Protein sequences of Na4CL and NaCNL homologs (found by BLASTp) are aligned with AAE superfamily and *Petunia hybrida* homologs, by neighbor-joining method (Saitou & Nei, 1987). The percentage of replicate trees in which the associated taxa clustered together in the bootstrap test (1000 replicates) is shown next to the branches (Felsenstein, 1985). The evolutionary distances were computed using the Poisson correction method and are in the units of the number of amino acid substitutions per site (ZUCKERKANDL & PAULING, 1965). Evolutionary analyses were conducted in MEGA X (Kumar *et al.*, 2018).

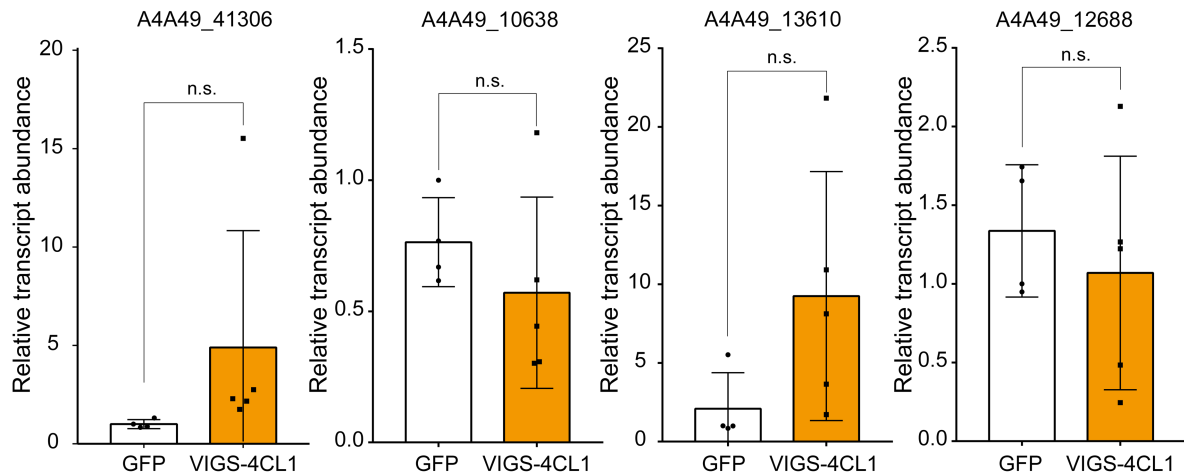

**Figure S12. 4CL and CNL homologues are not co-silenced in *Na4CL1*-silenced flowers**

Transcript accumulation of two *Na4CL1* homologues (A4A49\_41306 and A4A49\_10638) and two *NaCNL* homologues (A4A49\_13610 and A4A49\_12688) in *Na4CL1*-silenced flowers. *Na4CL1* was silenced without co-silencing of other homologues in corolla limbs. Mean ( $\pm$  SE) levels of transcript accumulation (two-tailed Students' t-test; n.s., not significant,  $p \geq 0.05$ ).

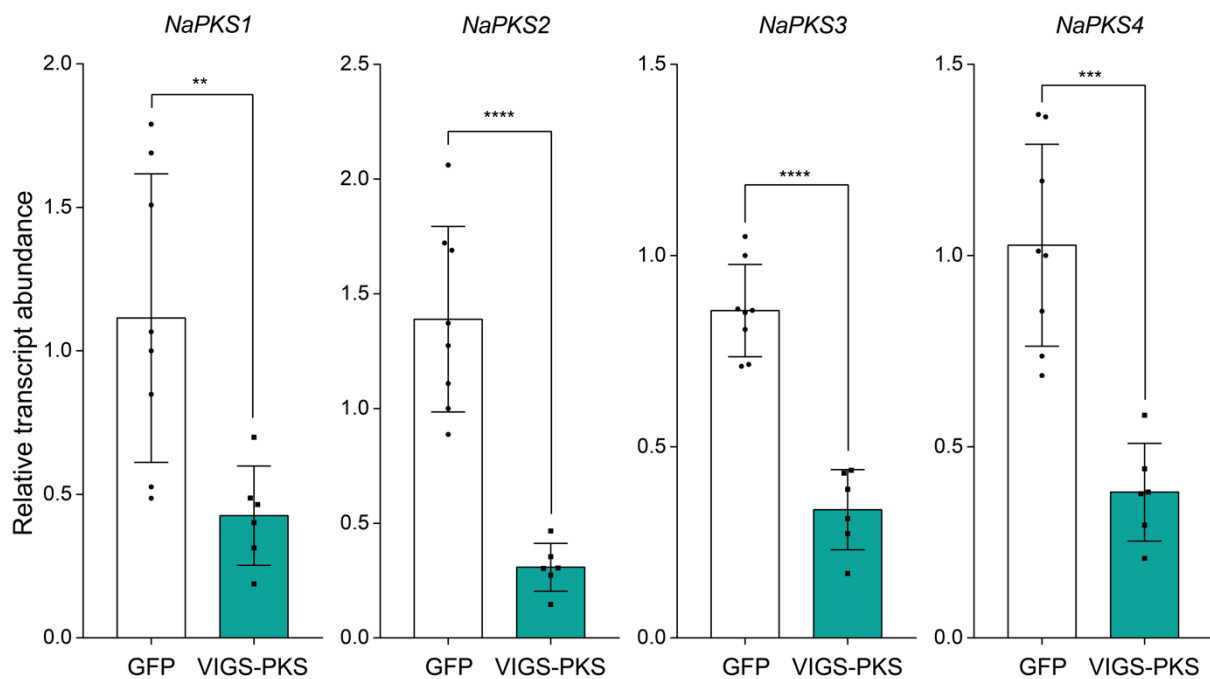

**Figure S13. Co-silencing of *NaPKS1/2/3/4* in *NaPKS3*-VIGS flowers**

After *NaPKS3* was silenced by VIGS, other *PKSs* were also significantly co-silenced in corolla limbs. Values represent individual flowers (biological replicates). (mean  $\pm$  SE, two-tailed Students' t-test; \*\*,  $p < 0.01$ ; \*\*\*,  $p < 0.001$ ; \*\*\*\*,  $p < 0.0001$ ) NaPKS1, A4A49\_08280; NaPKS2, A4A49\_34074; NaPKS3, A4A49\_39367; NaPKS4, A4A49\_65921.

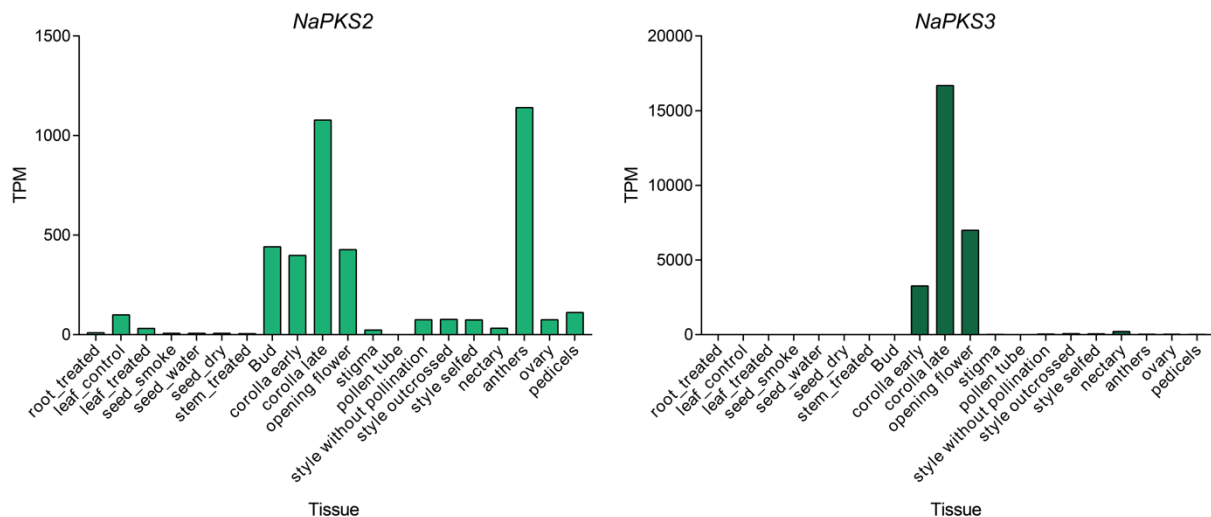

**Figure S14. Tissue-specific expression of *NaPKS2* and *NaPKS3* in *N. attenuata***

TPM values from tissue-specific bulk RNA-seq datasets show that both *NaPKS2* and *NaPKS3* are highly expressed in flower tissues, especially in the corolla. *NaPKS2* is also highly accumulated in anthers. ([http://nadh.ice.mpg.de/NaDH/chart/expression\\_genes](http://nadh.ice.mpg.de/NaDH/chart/expression_genes))

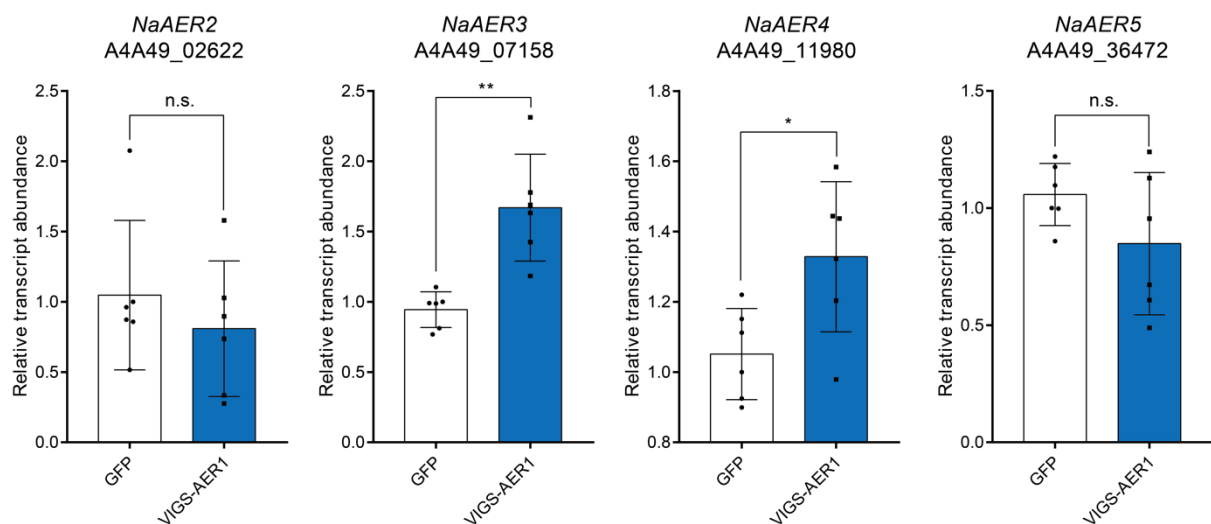

**Figure S15. AER homologs are not co-silenced in *NaAER1*-silenced flowers.**

*NaAER1* was silenced without co-silencing of other 2-alkenal reductases in corolla limbs. Mean ( $\pm$  SE) levels of transcript accumulation (two-tailed Students' t-test; n.s., not significant, \*,  $p < 0.05$ ; \*\*,  $p < 0.01$ ).

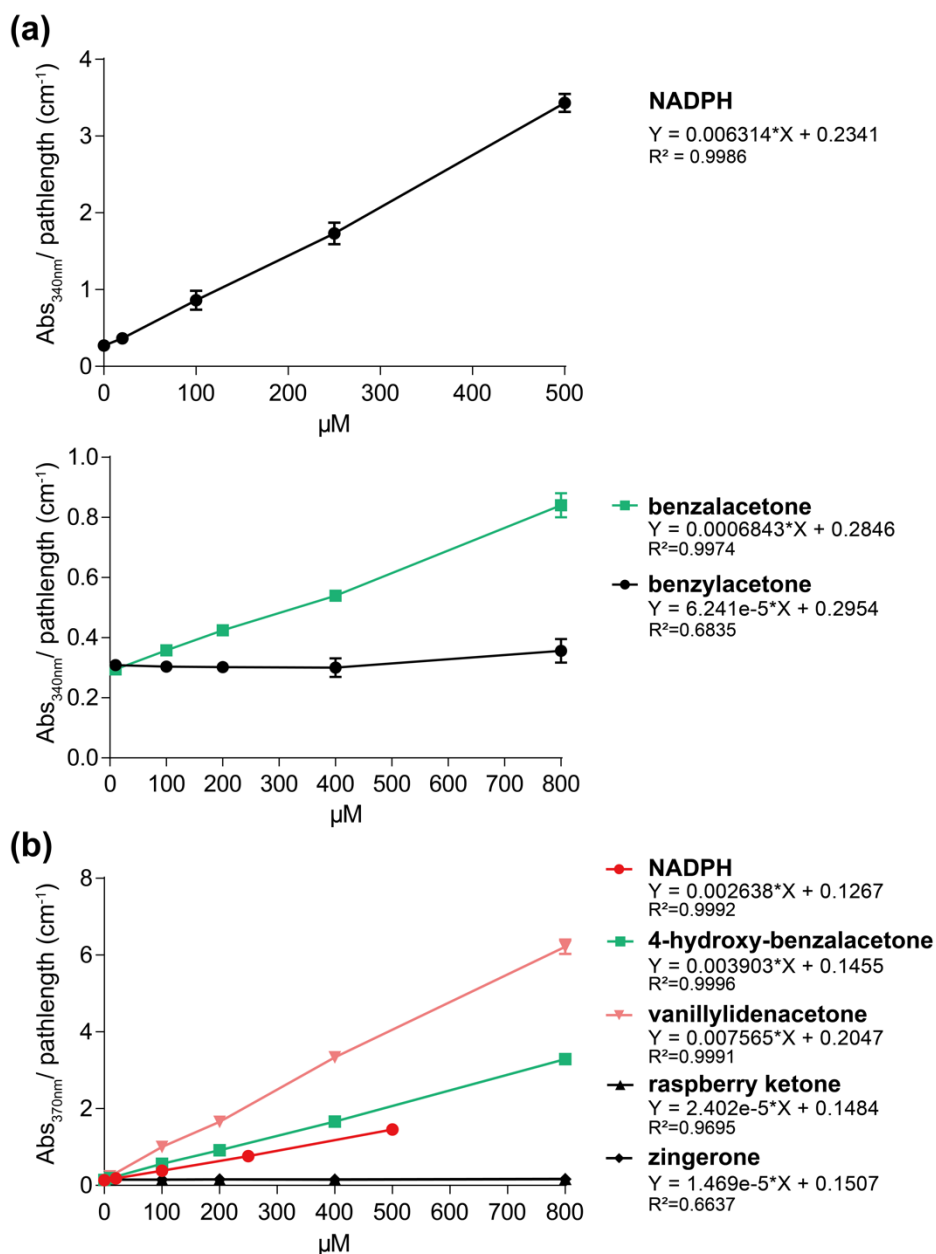

**Figure S16. Extinction coefficients used for NaAER1 kinetics**

Extinction coefficients of putative substrates and products of NaAER1 enzyme reaction were determined experimentally (mean  $\pm$  SD). **(a)** Extinction coefficient of benzalacetone at 340 nm was about 0.1-fold the coefficient of NADPH, which has an absorption maximum at 340 nm. Benzylacetone, which is a putative reduced product of benzalacetone, shows low absorption at 340 nm. **(b)** Coefficients of benzalacetone derivatives, 4-hydroxy-benzalacetone and vanillylidenacetone, were determined at 370 nm. NADPH has a lower extinction coefficient, at 370 nm than at 340 nm. Raspberry ketone and zingerone, reduced forms of 4-hydroxy-benzalacetone and vanillylidenacetone respectively, absorb less light at 370 nm.

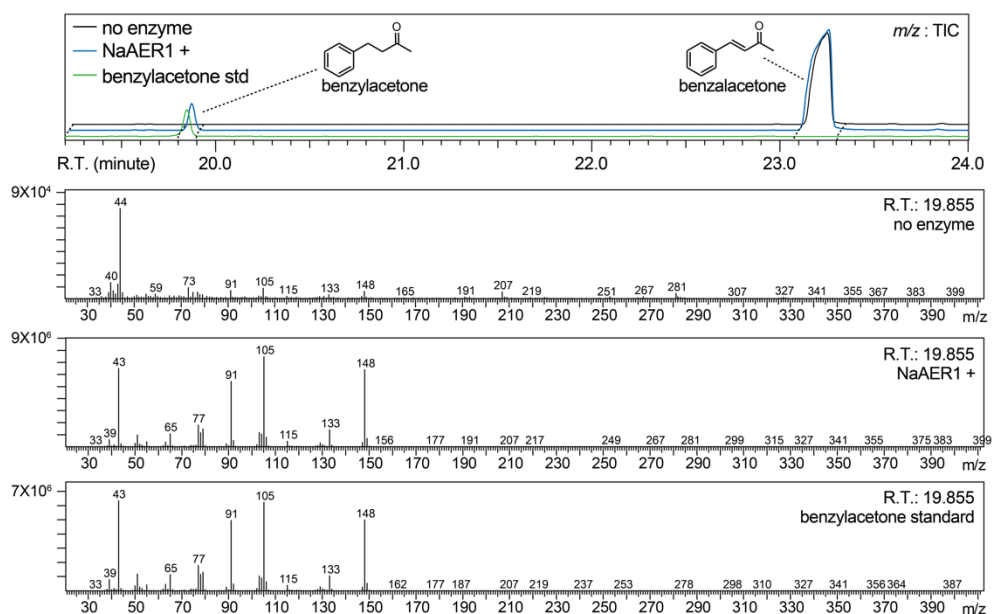

**Figure S17. NaAER1 can reduce benzalacetone to benzylacetone**

Benzalacetone can be reduced to benzylacetone, when incubated with NADPH and NaAER1 protein. After NaAER1-benzalacetone incubation, a new peak was eluted at retention time (RT) 19.855 min, which corresponds to RT of benzylacetone standard. The mass spectrometry fragmentation pattern of RT 19.855 min is also the same as that for standard.



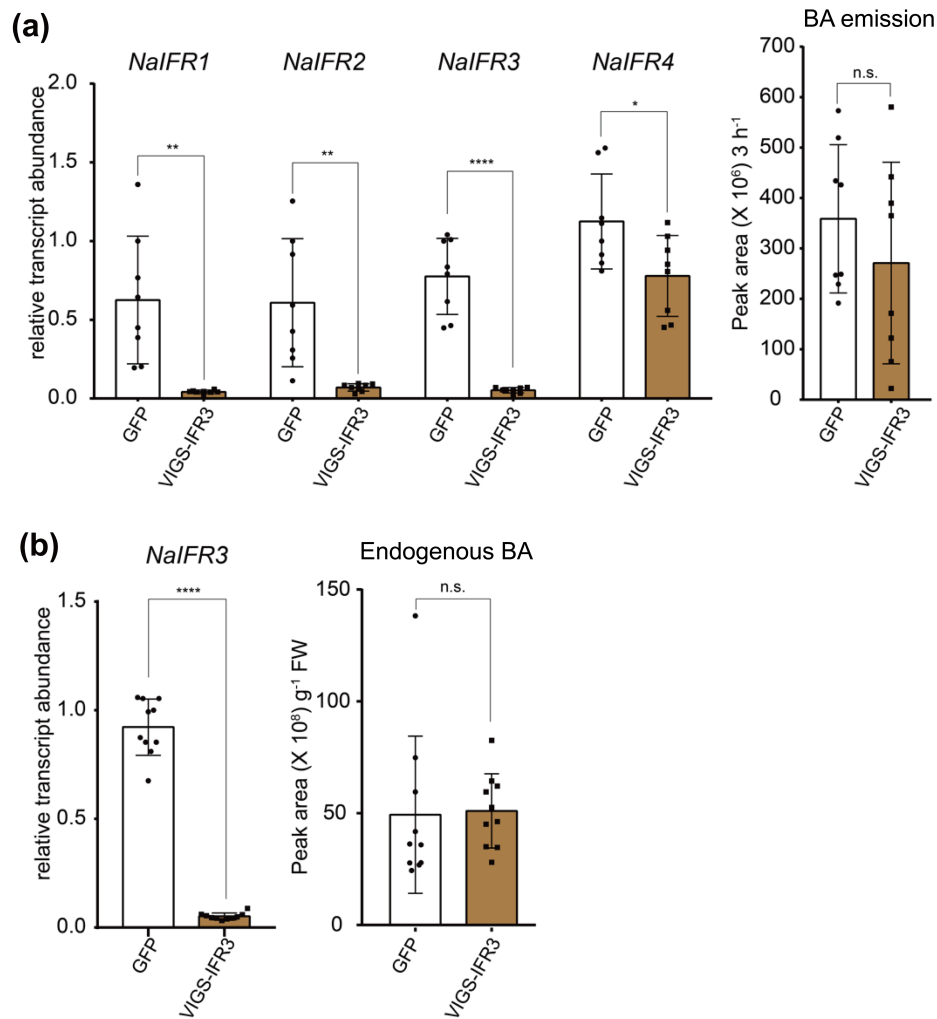

**Figure S18. Silencing *NaIFR* transcription does not alter BA biosynthesis in corolla**

Isoflavone reductase 3 (*NaIFR3*, A4A49\_30373) was previously identified as a reductase involved in BA biosynthesis. We silenced the expression of *NaIFR3* and its homologs to verify whether they redundantly function for BA biosynthesis. **(a)** Virus-induced gene silencing was used to reduce the level of *NaIFR1/2/3/4* in the corolla. Silencing efficiency of individual replicates was confirmed by qRT-PCR, with a 15.1-fold decrease in *NaIFR1*, an 8.7-fold decrease in *NaIFR2*, a 14.8-fold decrease in *NaIFR3*, and a 1.44-fold decrease in *NaIFR4* (mean  $\pm$  SE, two-tailed Students' t-test; \*,  $p < 0.05$ , \*\*,  $p < 0.005$ , \*\*\*\*,  $p < 0.0001$ ). BA emission was slightly reduced in *NaIFRs*-silenced flowers (mean  $\pm$  SE, two-tailed Students' t-test,  $p = 0.3348$ ). **(b)** To further confirm the function of *NaIFRs* for BA biosynthesis, we measured endogenous BA levels in *NaIFRs*-silenced flowers (mean  $\pm$  SE, two-tailed Students' t-test; n.s., not significant, \*\*\*\*,  $p < 0.0001$ ). *NaIFRs*-silenced flowers retained the same levels of BA as control flowers (mean  $\pm$  SE, two-tailed Students' t-test,  $p = 0.8912$ ). *NaIFR1*, A4A49\_26421; *NaIFR2*, A4A49\_30375; *NaIFR3*, A4A49\_30373; *NaIFR4*, A4A49\_18736.

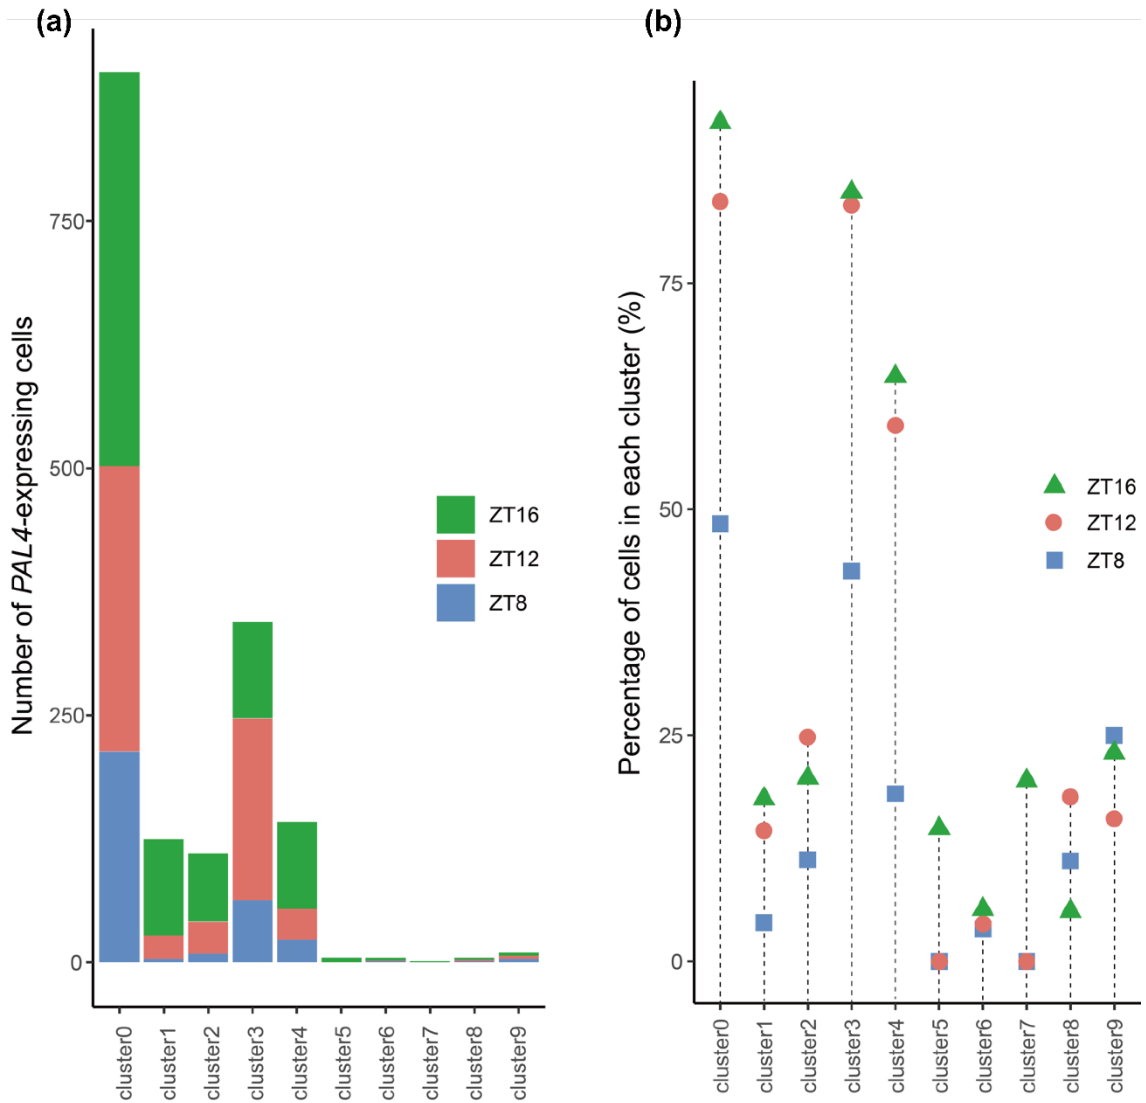

**Figure S19. *NaPAL4* transcripts are highly expressed in clusters 0, 3, and 4**

**(a)** Numbers of cells expressing *NaPAL4* transcripts across all clusters at three time points. **(b)** Percentage of cells expressing *NaPAL4* across all clusters at three time points.

(a) *pNaPAL4::eGFP*

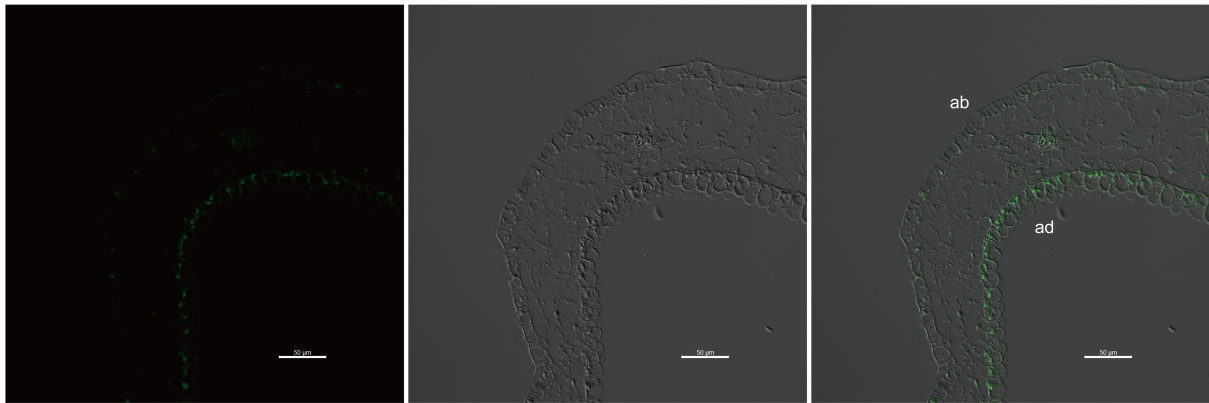

(b) *pNaPKS2::eGFP*

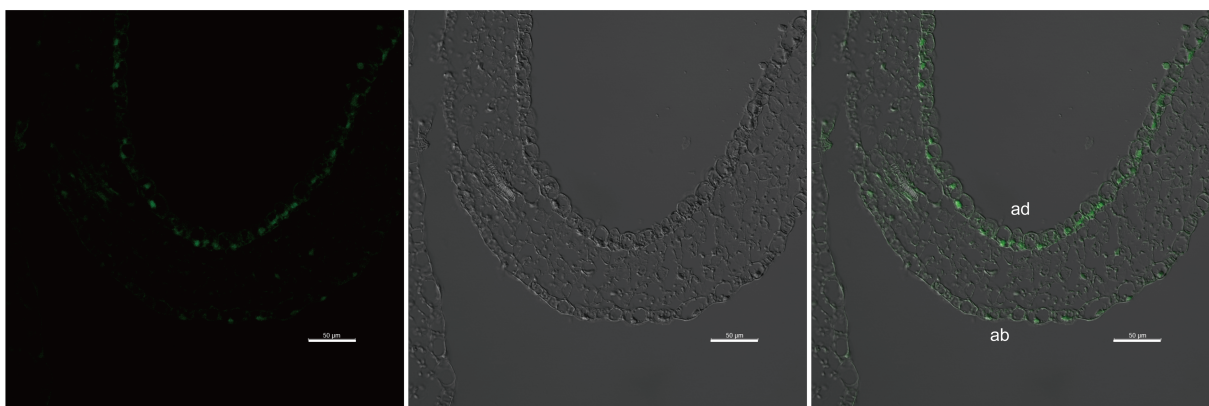

(c) WT

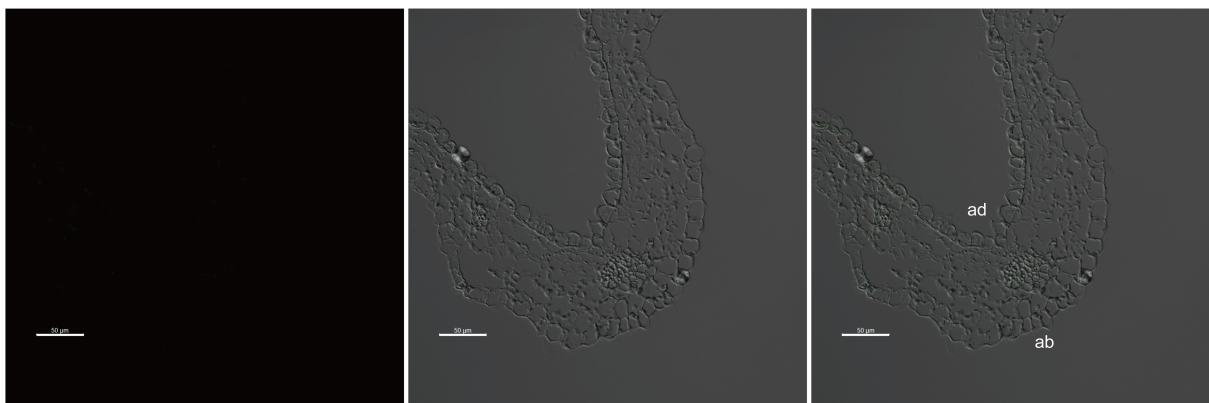

**Figure S20. Expression of *NaPAL4* and *NaPKS2* in *N. attenuata* flowers**

Confocal laser-scanning microscopy images (scale bar = 50 µm) of *pNaPAL4::eGFP* and *pNaPKS2::eGFP* in *N. attenuata* flowers collected at ZT 8. **(a, b)** Fluorescence signals driven by two promoters are localized in the epidermal cells, and are stronger in the adaxial epidermis than in the abaxial epidermis. ad, adaxial; ab, abaxial.

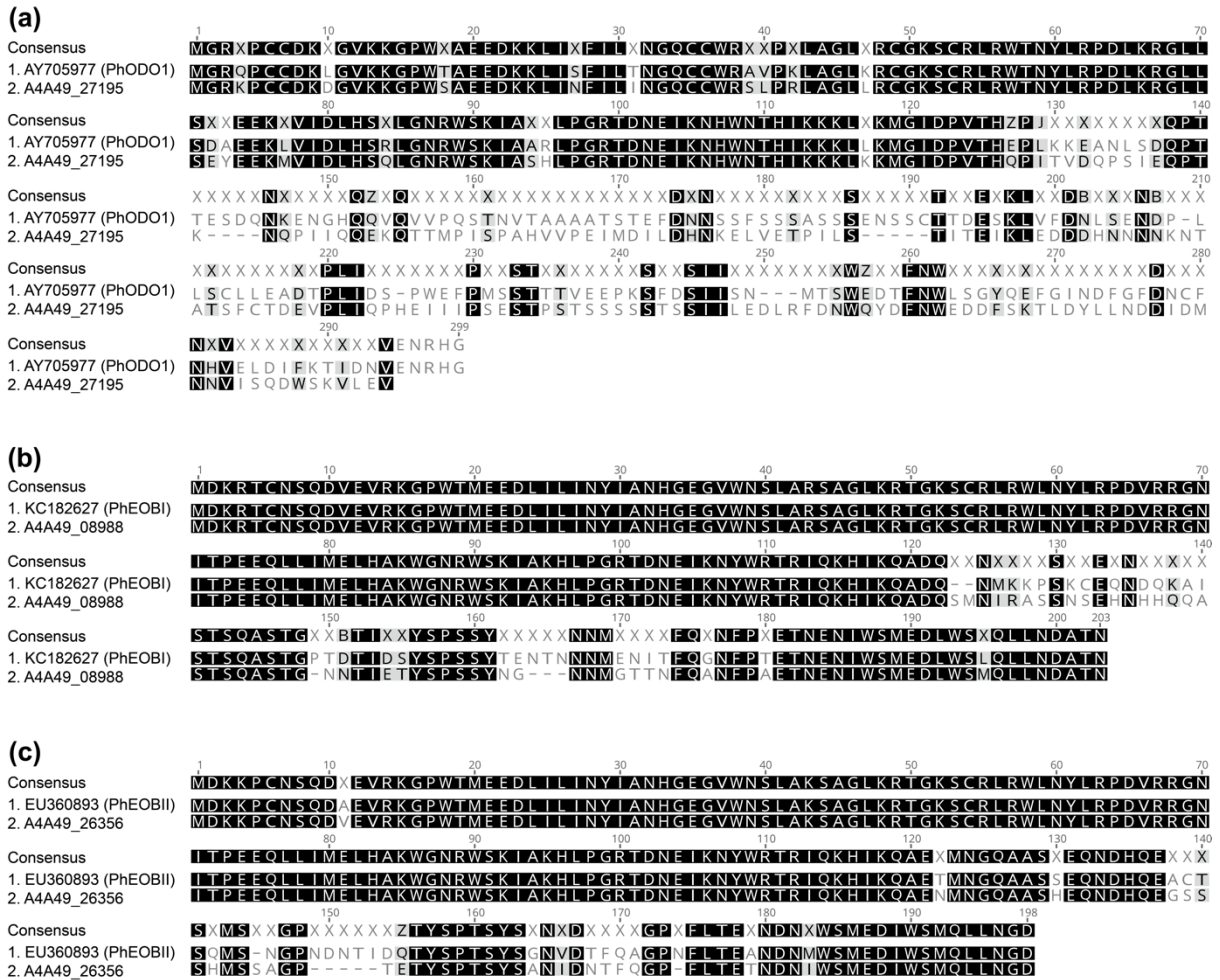

**Figure S21. *N. attenuata* homologs of *Petunia*×*hybrida* MYB transcription factors**

Protein sequence alignments of *P. hybrida* ODORANT1 (PhODO1) and *P. hybrida* EMISSION OF BENZENOID I/II (PhEOBI/II) with their *N. attenuata* homologs. Full-length amino acid sequences were aligned using Clustal W implemented in the Geneious software. **(a)** Among the PhODO1 homologs searched by BLASTP on *N. attenuata* protein sequences, A4A49\_27195 (NaODO1) is a gene that are meaningfully expressed in *N. attenuata* flowers. **(b, c)** A4A49\_08988 (NaEOBI) and A4A49\_26356 (NaEOBII) are the MYB transcription factors homologous to PhEOBI and PhEOBII.

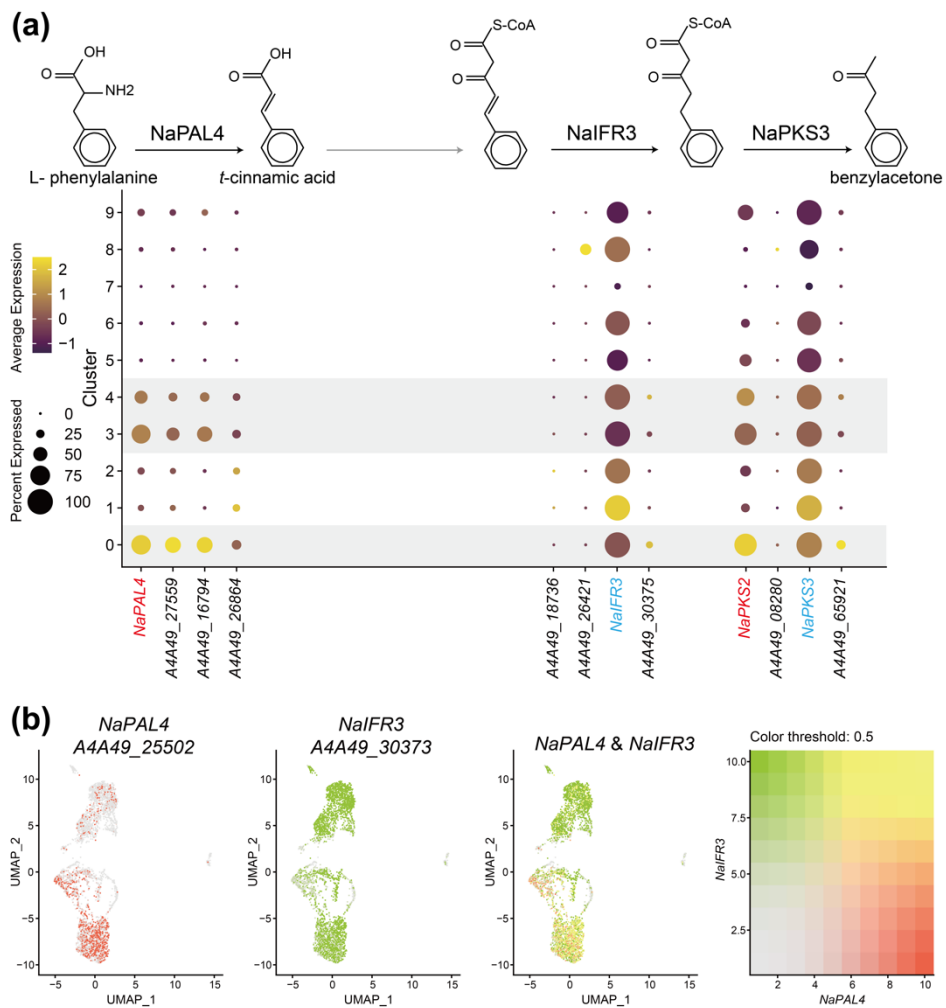

**Figure S22. *NaIFR3* expression patterns in scRNA-seq dataset**

**(a)** Dotplot showing previous BA biosynthesis model, including *IFR3* (Guo *et al.*, 2020). Genes marked in red (*NaPKS2*) are components of new BA biosynthetic model suggested in this study, and blue-colored genes (*NaIFR3* and *NaPKS3*) are components of previous model. Homologous genes of each gene are denoted next to them in black. *NaIFR3* as well as *NaPKS3* are expressed across almost all clusters. **(b)** *NaPAL4* and *NaIFR3* are merged on featureplots. *NaIFR3* is expressed also in upper clusters, where *NaPAL4* is less expressed.

## Reference

- Brockmüller T, Ling Z, Li D, Gaquerel E, Baldwin IT, Xu S. 2017.** *Nicotiana attenuata* Data Hub (NaDH): An integrative platform for exploring genomic, transcriptomic and metabolomic data in wild tobacco. *BMC Genomics* **18**: 1–11.
- Chen LQ, Qu XQ, Hou BH, Sosso D, Osorio S, Fernie AR, Frommer WB. 2012.** Sucrose efflux mediated by SWEET proteins as a key step for phloem transport. *Science* **335**: 207–211.
- Felsenstein J. 1985.** Confidence limits on phylogenies: an approach using the bootstrap. *Evolution* **39**: 783.
- Guo H, Lackus ND, Köllner TG, Li R, Bing J, Wang Y, Baldwin IT, Xu S. 2020.** Evolution of a novel and adaptive floral scent in wild tobacco. *Molecular Biology and Evolution* **37**: 1090–1099.
- Kessler D, Gase K, Baldwin IT. 2008.** Field experiments with transformed plants reveal the sense of floral scents. *Science* **321**:1200–1202. doi:10.1126/science.1160072
- Kim J-Y, Symeonidi E, Pang TY, Denyer T, Weidauer D, Bezruczyk M, Miras M, Zöllner N, Hartwig T, Wudick MM, et al. 2021.** Distinct identities of leaf phloem cells revealed by single cell transcriptomics. *The Plant Cell* **33**:511–530. doi:10.1093/plcell/koaa060
- Kumar S, Stecher G, Li M, Knyaz C, Tamura K. 2018.** MEGA X: Molecular evolutionary genetics analysis across computing platforms. *Molecular Biology and Evolution* **35**: 1547–1549.
- Li-Beisson Y, Pollard M, Sauveplane V, Pinot F, Ohlrogge J, Beisson F. 2009.** Nanoridges that characterize the surface morphology of flowers require the synthesis of cutin polyester. *Proceedings of the National Academy of Sciences of the United States of America* **106**: 22008–22013.
- Li D, Heiling S, Baldwin IT, Gaquerel E. 2016.** Illuminating a plant's tissue-specific metabolic diversity using computational metabolomics and information theory. *Proceedings of the National Academy of Sciences of the United States of America* **113**:E7610–E7618. doi:10.1073/pnas.1610218113
- Maruyama-Nakashita A, Watanabe-Takahashi A, Inoue E, Yamaya T, Saito K, Takahashi H. 2015.** Sulfur-responsive elements in the 3'-nontranscribed intergenic region are essential for the induction of *SULFATE TRANSPORTER 2;1* gene expression in *Arabidopsis* roots under sulfur deficiency. *Plant Cell* **27**: 1279–1296.

**Saitou N, Nei M. 1987.** The neighbor-joining method: a new method for reconstructing phylogenetic trees. *Molecular biology and evolution* **4**: 406–425.

**Suh MC, Samuels AL, Jetter R, Kunst L, Pollard M, Ohlrogge J, Beisson F. 2005.** Cuticular lipid composition, surface structure, and gene expression in *Arabidopsis* stem epidermis. *Plant Physiology* **139**: 1649–1665.

**Tang J, Yang X, Xiao C, Li J, Chen Y, Li R, Li S, Lü S, Hu H. 2020.** GDSL lipase occluded stomatal pore 1 is required for wax biosynthesis and stomatal cuticular ledge formation. *New Phytologist* **228**: 1880–1896.

**ZUCKERKANDL E, PAULING L. 1965.** Evolutionary divergence and convergence in proteins. In: Bryson V, Vogel HJBT-EG and P, eds. Academic Press, 97–166.

**Table S1. 121 genes excluded for analysis**

| Locus tag ID | NCBI_gene description                                     |
|--------------|-----------------------------------------------------------|
| A4A49_04901  | exocyst complex component exo70a1                         |
| A4A49_08097  | uncharacterized WD repeat-containing protein alr3466-like |
| A4A49_08976  | NAC domain-containing protein 2-like                      |
| A4A49_16875  | E3 ubiquitin-protein ligase ATL31-like                    |
| A4A49_35076  | putative calcium-binding protein CML19                    |
| A4A49_01686  | hypothetical protein                                      |
| A4A49_05562  | u-box domain-containing protein 21                        |
| A4A49_42257  | uncharacterized LOC109211123                              |
| A4A49_13806  | NDR1/HIN1-like protein 3-like                             |
| A4A49_08885  | nodulin-related protein 1-like                            |
| A4A49_01593  | ethylene-responsive transcription factor erf109           |
| A4A49_41221  | exocyst complex component EXO70A1-like                    |
| A4A49_30015  | ethylene-responsive transcription factor erf019           |
| A4A49_38493  | uncharacterized LOC109223861                              |
| A4A49_37763  | uncharacterized LOC109223885                              |
| A4A49_37762  | uncharacterized LOC109223886                              |
| A4A49_08704  | hypothetical protein A4A49_08704                          |
| A4A49_22454  | uncharacterized LOC109225120                              |
| A4A49_01661  | zinc finger protein ZAT10-like                            |
| A4A49_09742  | hypothetical protein A4A49_09742                          |
| A4A49_03446  | uncharacterized LOC109227747                              |
| A4A49_07063  | hypothetical protein A4A49_07063                          |
| A4A49_25717  | hypothetical protein A4A49_25717                          |
| A4A49_33780  | e3 ubiquitin-protein ligase pub23                         |
| A4A49_59916  | RING-H2 finger protein ATL3-like                          |
| A4A49_00112  | protein UPSTREAM OF FLC-like                              |
| A4A49_01093  | cycloartenol Synthase-like                                |
| A4A49_30862  | dehydration-responsive element-binding protein 1f         |
| A4A49_42272  | ethylene-responsive transcription factor 4-like           |
| A4A49_28282  | E3 ubiquitin-protein ligase Hakai-like                    |
| A4A49_33511  | uncharacterized LOC109231204                              |
| A4A49_04398  | uncharacterized LOC109232053                              |
| A4A49_30397  | putative nuclease HARBI1                                  |
| A4A49_27533  | probable carboxylesterase 16                              |
| A4A49_51721  | hypothetical protein A4A49_51721                          |
| A4A49_12278  | hypothetical protein A4A49_12278                          |
| A4A49_18295  | glutaredoxin-c9                                           |
| A4A49_58651  | uncharacterized LOC109235426                              |
| A4A49_10323  | EG45-like domain containing protein                       |
| A4A49_30267  | protein PLANT CADMIUM RESISTANCE 2-like                   |
| A4A49_39253  | probable protein phosphatase 2C 25                        |
| A4A49_08252  | transcription factor bHLH35                               |



|             |                                                                |
|-------------|----------------------------------------------------------------|
| A4A49_00712 | hypothetical protein A4A49_00712                               |
| A4A49_28978 | dehydration-responsive element-binding protein 1f              |
| A4A49_51246 | hypothetical protein A4A49_51246                               |
| A4A49_65778 | 17.6 kDa class I heat shock protein-like                       |
| A4A49_04460 | 17.6 kda class i heat shock protein                            |
| A4A49_01061 | hypothetical protein A4A49_01061                               |
| A4A49_25741 | classical arabinogalactan protein 5-like                       |
| A4A49_43070 | hypothetical protein A4A49_43070                               |
| A4A49_52264 | hypothetical protein A4A49_52264                               |
| A4A49_35025 | hypothetical protein A4A49_35025                               |
| A4A49_27124 | uncharacterized LOC109241637                                   |
| A4A49_19893 | uncharacterized LOC109241892                                   |
| A4A49_27795 | putative wrky transcription factor 53                          |
| A4A49_64938 | protein yls9                                                   |
| A4A49_16953 | ndr1hin1-like protein 3                                        |
| A4A49_64937 | ndr1hin1-like protein 3                                        |
| A4A49_16956 | protein YLS9-like                                              |
| A4A49_27136 | cytochrome P450 94A1-like                                      |
| A4A49_24482 | hypothetical protein A4A49_24482                               |
| A4A49_24481 | uncharacterized LOC109243614                                   |
| A4A49_28238 | exocyst complex component exo70a1                              |
| A4A49_02919 | E3 ubiquitin-protein ligase RMA1H1-like                        |
| A4A49_05755 | uncharacterized LOC109243962                                   |
| A4A49_25653 | ethylene-responsive transcription factor erf017                |
| A4A49_09712 | iaa-amino acid hydrolase ilr1-like 1                           |
| A4A49_09948 | putative calcium-binding protein cml31                         |
| A4A49_09949 | calcium-binding protein cml37                                  |
| A4A49_09950 | putative calcium-binding protein CML19                         |
| A4A49_10806 | zinc finger protein zat11                                      |
| A4A49_52374 | zinc finger protein ZAT12-like                                 |
| A4A49_10804 | zinc finger protein zat11                                      |
| A4A49_22093 | uncharacterized LOC109206584                                   |
| A4A49_07999 | uncharacterized LOC109206786                                   |
| A4A49_08106 | ethylene-responsive transcription factor erf109                |
| A4A49_23019 | ethylene-responsive transcription factor erf109                |
| A4A49_23016 | ethylene-responsive transcription factor erf109                |
| A4A49_08257 | oleosin 21.2 kda                                               |
| A4A49_26226 | hypothetical protein A4A49_26226                               |
| A4A49_34506 | hypothetical protein A4A49_34506                               |
| A4A49_33923 | cucumber peeling cupredoxin                                    |
| A4A49_10619 | zinc finger AN1 domain-containing stress-associated protein 12 |
| A4A49_33179 | uncharacterized LOC109208622                                   |
| A4A49_11952 | uncharacterized LOC109209072                                   |

|             |                                                           |
|-------------|-----------------------------------------------------------|
| A4A49_11575 | uncharacterized LOC109209257                              |
| A4A49_12259 | dehydration-responsive element-binding protein 1f         |
| A4A49_14244 | uncharacterized LOC109209866                              |
| A4A49_12965 | calcium-binding protein cml38                             |
| A4A49_25324 | lysine histidine transporter-like 7                       |
| A4A49_13871 | hypothetical protein A4A49_13871                          |
| A4A49_21385 | protein hyper-sensitivity-related 4                       |
| A4A49_16537 | hypothetical protein A4A49_16537                          |
| A4A49_35987 | putative glycine-rich cell wall structural protein 1      |
| A4A49_25048 | hypothetical protein A4A49_25048                          |
| A4A49_41474 | ethylene-responsive transcription factor erf109           |
| A4A49_31384 | probable WRKY transcription factor 53                     |
| A4A49_24534 | chaperone protein dnaj 11, chloroplastic                  |
| A4A49_25089 | dehydration-responsive element-binding protein 1A-like    |
| A4A49_28100 | ethylene-responsive transcription factor erf017           |
| A4A49_37911 | hypothetical protein A4A49_37911                          |
| A4A49_62051 | zinc finger protein zat11                                 |
| A4A49_29168 | peroxidase n1                                             |
| A4A49_37140 | uncharacterized LOC109216478                              |
| A4A49_36228 | ethylene-responsive transcription factor ERF026-like      |
| A4A49_39300 | putative glutathione s-transferase                        |
| A4A49_38427 | 17.3 kDa class II heat shock protein-like                 |
| A4A49_64179 | auxin-responsive protein saur32                           |
| A4A49_32032 | hypothetical protein A4A49_32032                          |
| A4A49_32862 | u-box domain-containing protein 21                        |
| A4A49_36195 | glutathione s-transferase u10                             |
| A4A49_33478 | uncharacterized LOC109218635                              |
| A4A49_37711 | heavy metal-associated isoprenylated plant protein 3-like |
| A4A49_38235 | 17.3 kDa class II heat shock protein                      |
| A4A49_38953 | hypothetical protein A4A49_38953                          |
| A4A49_38797 | calmodulin-binding protein 25-like                        |
| A4A49_41099 | exocyst complex component EXO70A1-like                    |
| A4A49_64622 | uncharacterized LOC109221284                              |
| A4A49_41019 | cytochrome p450 94b3                                      |
| A4A49_41206 | uncharacterized LOC109221416                              |
| A4A49_42489 | u-box domain-containing protein 21                        |

## Table S2. Primers used in this study

Primer sequences and their purposes are listed in table. Red-colored sequences are overhang sequences added for gibbon cloning, which overlap with the ends of linearized vectors digested by restriction enzymes. Black sequences anneal to the PCR template.

| Name                 | Sequence (Red: overhang sequence for cloning)     | Purpose                                                                                    |
|----------------------|---------------------------------------------------|--------------------------------------------------------------------------------------------|
| EF1a_qPCR_F          | TGCTGTGAGGGACATGCGT                               | qPCR control                                                                               |
| EF1a_qPCR_R          | TCTTCTGGGCAGCCTTGGT                               | qPCR control                                                                               |
| IFR1_qPCR_F          | TCTCCAATGCCATTGCCTGTC                             | A4A49_26421_qPCR                                                                           |
| IFR1_qPCR_R          | AGGCCTCAACCCCAATGATG                              | A4A49_26421_qPCR                                                                           |
| IFR2_qPCR_F          | TCAATGTCGCGTTGGCACTTA                             | A4A49_30375_qPCR                                                                           |
| IFR2_qPCR_R          | GGTACTCTCCGAGTAGTGT                               | A4A49_30375_qPCR                                                                           |
| IFR3_qPCR_F          | GGAACATGATGCTTGACCTACA                            | A4A49_30373_qPCR                                                                           |
| IFR3_qPCR_R          | TCTCCACATAGCCACTAACTCA                            | A4A49_30373_qPCR                                                                           |
| IFR4_qPCR_F          | GGGAGTTGATAGGCAAGTGGG                             | A4A49_18736_qPCR                                                                           |
| IFR4_qPCR_R          | GACTCTACTGCCAGCATA                                | A4A49_18736_qPCR                                                                           |
| PKS1_qPCR_F          | TAGTGGAGTAGACATGCCGGG                             | A4A49_08280_qPCR                                                                           |
| PKS1_qPCR_R          | ACATCATGAGCCGCTTTACCG                             | A4A49_08280_qPCR                                                                           |
| PKS2_qPCR_F          | GATGGAGCAGCCGCGATTATT                             | A4A49_34074_qPCR                                                                           |
| PKS2_qPCR_R          | CGGCAATAAAGTTTGGGCTGC                             | A4A49_34074_qPCR                                                                           |
| PKS3_qPCR_F          | GGACTTAGCCGAAAACAACCAGG                           | A4A49_39367_qPCR                                                                           |
| PKS3_qPCR_R          | CACCTGGGCTTGAACGTGAAT                             | A4A49_39367_qPCR                                                                           |
| PKS4_qPCR_F          | TGTTTGCTCAGAGATCACCGC                             | A4A49_65921_qPCR                                                                           |
| PKS4_qPCR_R          | AACAAAGGCCTCTCGACCTCT                             | A4A49_65921_qPCR                                                                           |
| 4CL1_qPCR_F          | GTTTACGCCAGCAGAGTTGT                              | A4A49_40482_qPCR                                                                           |
| 4CL1_qPCR_R          | AGCGTAATCCTTCACTTTGCC                             | A4A49_40482_qPCR                                                                           |
| 4CL2_qPCR_F          | CCCTTGGTTCTTGCGTTGGC                              | A4A49_41306_qPCR                                                                           |
| 4CL2_qPCR_R          | CGCTTCTCCAACCTTTCCC                               | A4A49_41306_qPCR                                                                           |
| AER1_qPCR_F          | TCCAGACTTCAAGCCAGGTGA                             | A4A49_31470_qPCR                                                                           |
| AER1_qPCR_R          | GCATGCCAAGAAGCCGACAT                              | A4A49_31470_qPCR                                                                           |
| A4A49_07158_qPCR_F   | TGTGGGAGGGAAGATGCTTGA                             | AER homologs qPCR                                                                          |
| A4A49_07158_qPCR_R   | GCGAGATCATCCCACACACAG                             | AER homologs qPCR                                                                          |
| A4A49_11980_qPCR_F   | TGGAGGAAAGATGCTTGACGC                             | AER homologs qPCR                                                                          |
| A4A49_11980_qPCR_R   | ACTCCTCAGACTGCTCGAGG                              | AER homologs qPCR                                                                          |
| A4A49_02622_qPCR_F   | CAATTGGGATTGCGTTGCC                               | AER homologs qPCR                                                                          |
| A4A49_02622_qPCR_R   | AATTCCAACTCCTCCCGCTG                              | AER homologs qPCR                                                                          |
| A4A49_36472_qPCR_F   | CGATTTTGTGGAGCCTTGAAA                             | AER homologs qPCR                                                                          |
| A4A49_36472_qPCR_R   | CAAGAGCACTCATCCAGCATA                             | AER homologs qPCR                                                                          |
| A4A49_27195_qPCR_F   | AACAAATGCCAATTTCCCGAGC                            | ODO1-like qPCR                                                                             |
| A4A49_27195_qPCR_R   | TTGTTGGTTCGTCGCTTCT                               | ODO1-like qPCR                                                                             |
| A4A49_08988_qPCR_F   | ACAAGCCAAGCTTCTACTGGAA                            | EOBI homolog qPCR                                                                          |
| A4A49_08988_qPCR_R   | TTTCAGCTGGAAAATTGGCCTG                            | EOBI homolog qPCR                                                                          |
| A4A49_26356_qPCR_F   | GGAGGACAAGGATTGAGAAGCA                            | EOBII homolog qPCR                                                                         |
| A4A49_26356_qPCR_R   | CAGCAGACGACATATGGCTACT                            | EOBII homolog qPCR                                                                         |
| A4A49_25502_Gibson_F | <b>ATTCGAGCTCTCCCATATGG</b> AGCTTAAAAGAAGGCATT    | promoter (2kb) Gibson pcr_pPAL4::eGFP                                                      |
| A4A49_25502_Gibson_R | <b>CTAGTCGGCCGCTGCGAGG</b> TGCTAAAGTACTAAATATGTAT | promoter (2kb) Gibson pcr_pPAL4::eGFP                                                      |
| A4A49_34074_Gibson_F | <b>ATTCGAGCTCTCCCATATGG</b> GACTATTTCTATACGTGTCGG | promoter (2kb) Gibson pcr_pPKS2::eGFP                                                      |
| A4A49_34074_Gibson_R | <b>CTAGTCGGCCGCTGCGAGG</b> TTTTCCGCCGAAAAAATGG    | promoter (2kb) Gibson pcr_pPKS2::eGFP                                                      |
| pTRV2:eGFP_F         | <b>AGGTTACCGAATTCT</b> CTGTTCACCGGGGTG            | pTRV2:eGFP gibbon assembly (XbaI/XhoI) - for negative control of VIGS                      |
| pTRV2:eGFP_R         | <b>GGACATGCCCGGGCC</b> CTTGTCCGCCATGAT            | pTRV2:eGFP gibbon assembly (XbaI/XhoI) - for negative control of VIGS                      |
| pTRV2:A4A49_40482-F  | <b>AGGTTACCGAATTCT</b> ACATCCCTAAGCATT            | pTRV2:A4A49_40482 gibbon assembly (XbaI/XhoI) - VIGS - 4-Coumarate CoA ligase 1            |
| pTRV2:A4A49_40482-R  | <b>GGACATGCCCGGGCC</b> ATGGCTCCTAAATAT            | pTRV2:A4A49_40482 gibbon assembly (XbaI/XhoI) - VIGS - 4-Coumarate CoA ligase 1            |
| pTRV2:A4A49_30373_F  | <b>AGGTTACCGAATTCT</b> GAAAGGAATTCCTTACT          | pTRV2:A4A49_30373 gibbon assembly (XbaI/XhoI) - VIGS - Isoflavone reductase 3              |
| pTRV2:A4A49_30373_R  | <b>GGACATGCCCGGGCC</b> ACTCATTGAACGATAAT          | pTRV2:A4A49_30373 gibbon assembly (XbaI/XhoI) - VIGS - Isoflavone reductase 3              |
| pTRV2:A4A49_39367_F  | <b>AGGTTACCGAATTCT</b> ACAAAATGCCATCGA            | pTRV2:A4A49_39367 gibbon assembly (XbaI/XhoI) - VIGS - Polyketide synthase 3               |
| pTRV2:A4A49_39367_R  | <b>GGACATGCCCGGGCC</b> GATCTCCGAGCAAAC            | pTRV2:A4A49_39367 gibbon assembly (XbaI/XhoI) - VIGS - Polyketide synthase 3               |
| pTRV2:A4A49_31470_F  | <b>AGGTTACCGAATTCT</b> GTTGAGCTACTAGGA            | pTRV2:A4A49_31470 gibbon assembly (XbaI/XhoI) - VIGS - 2-alkenal reductase 1               |
| pTRV2:A4A49_31470_R  | <b>GGACATGCCCGGGCC</b> CTTCAATTACCTCTCCA          | pTRV2:A4A49_31470 gibbon assembly (XbaI/XhoI) - VIGS - 2-alkenal reductase 1               |
| pET50-4CL1_gibson_F  | <b>TTTAAGAAGGAGATATACAA</b> TGCCTATGGAGAGTACA     | codon optimized sequence cloned into NdeI and PstI cutted pET50 (gibson)                   |
| pET50-4CL1_gibson_R  | <b>CGGAGCTCGCCTGCACAT</b> TTGGAACGCCCG            | codon optimized sequence cloned into NdeI and PstI cutted pET50 (gibson)                   |
| pET50-PKS3_gibson_F  | <b>TTTAAGAAGGAGATATACAA</b> TGGTCACTGTAGAGGA      | codon optimized sequence cloned into NdeI and PstI cutted pET50 (gibson)                   |
| pET50-PKS3_gibson_R  | <b>CGGAGCTCGCCTGCACAG</b> TTGAGACACTATGTAAT       | codon optimized sequence cloned into NdeI and PstI cutted pET50 (gibson)                   |
| pET50-PKS2_cloning_F | <b>TTTAAGAAGGAGATATACAA</b> TGGTCAACCGTCGAGG      | PKS2 sequence (without codon optimization) cloned into NdeI and PstI cutted pET50 (gibson) |
| pET50-PKS2_cloning_R | <b>CGGAGCTCGCCTGCACA</b> AGTAGAGACACTATGGAGCA     | PKS2 sequence (without codon optimization) cloned into NdeI and PstI cutted pET50 (gibson) |
| pET50-AER1_cloning_F | <b>TTTAAGAAGGAGATATACAA</b> TGGAGAAAAAGCAGGAAAAAG | AER1 sequence (without codon optimization) cloned into NdeI and PstI cutted pET50 (gibson) |
| pET50-AER1_cloning_R | <b>CGGAGCTCGCCTGCACA</b> AATCGTGCACCACGC          | AER1 sequence (without codon optimization) cloned into NdeI and PstI cutted pET50 (gibson) |
